1     **“Original Article”**

2

3

4     **Transcriptome profiling and comparison of *Rhinanthus major* and *Rhinanthus minor***  
5     **reciprocal F<sub>1</sub> hybrids during seed stratification and germination**

6

7

8     Khaled Mirzaei<sup>1</sup> & Renate A. Wesselingh<sup>1\*</sup>

9

10         1. Biodiversity Research Centre, Earth and Life Institute, UCLouvain, Croix du Sud 4

11             box L7.07.04, B-1348 Louvain-la-Neuve, Belgium

12

13         \*Corresponding Author details:

14         Prof. Renate A. Wesselingh

15         Address: Biodiversity Research Centre, Earth and Life Institute, UCLouvain, Croix du

16         Sud 4 box L7.07.04, B-1348 Louvain-la-Neuve, Belgium

17         Phone: +32 10 47.34.47

18         Email: [renate.wesselingh@uclouvain.be](mailto:renate.wesselingh@uclouvain.be)

19

20

21

22

23

24

25

26

27

28

29

30

31

32

33 **Abstract**

34 • Background and Aims

35 Germination is a vital stage in a plant's life cycle, and a different germination behavior of  
36 offspring in comparison to their parents can have fitness consequences. In studies on  
37 hybridization between *Rhinanthus minor* and *R. major*, low germination rates of F<sub>1</sub> hybrids  
38 with *R. major* as the maternal parent have often been reported. In contrast, the F<sub>1m</sub> hybrid,  
39 with *R. minor* as the maternal parent, germinates readily and rapidly.

40 • Methods

41 In order to find the cause of this difference, we used RNA-Seq to obtain transcriptome  
42 profiles of F<sub>1a</sub> and F<sub>1m</sub> seeds during stratification at 4°C and just after germination, after 40  
43 days of stratification for the F<sub>1m</sub> seeds and 60 days for the F<sub>1a</sub> seeds.

44 • Key Results

45 A comparison of the transcriptome of F<sub>1a</sub> seeds that had just germinated (60 days) with non-  
46 germinated F<sub>1a</sub> seeds after 40 and 60 days revealed 2918 and 1349 differentially expressed  
47 (DE) genes, respectively. For F<sub>1m</sub> seeds, 958 genes showed differential expression in  
48 germinated and non-germinated seeds after 40 days. The DE genes of F<sub>1a</sub> and F<sub>1m</sub> hybrids  
49 clustered into two separate groups, even though they had the same parents, and no  
50 differentially expression was found for plastid genes. Non-germinated F<sub>1a</sub> seeds had an  
51 abundance of enzymes and proteins associated with peroxidase activity, peroxiredoxin  
52 activity and nutrient reservoir activity. Expression of genes related to seed germination and  
53 seed development increased in non-germinated F<sub>1a</sub> hybrid seeds between 40 and 60 days of  
54 cold stratification. F<sub>1a</sub> seeds that had germinated showed an upregulation of genes related to  
55 the gibberellic acid-mediated signaling pathway and response to gibberellin, along with a low  
56 expression of DELLA superfamily.

57 • Conclusions

58 Although the results demonstrated strong differences in gene expression during stratification  
59 between the reciprocal hybrids, we could not identify its cause, since no plastid genes were  
60 differentially expressed. It is possible that differences in embryo development after seed  
61 formation and before stratification play a role, including epigenetic imprinting.

62 **Keyword:** Hybridization, Reproductive barrier, Maternal effect, Transcriptome, RNA-seq

63

64

## 65 **Introduction**

66 Natural hybridization is a source of novel genetic material for evolution and it can occur  
67 among species due to a lack of reproductive barriers. It is more common among plants than  
68 animals (Rieseberg 1997), and although it is rare in some families, in others, such as  
69 *Dennstaedtiaceae*, it is very common phenomena (Whitney *et al.* 2010). When hybridization  
70 occurs, the fate of the F<sub>1</sub> hybrid can vary from showing hybrid vigor—which has greatly  
71 benefited agriculture—to hybrid breakdown, which can be a key factor in speciation  
72 (Rieseberg 1997; Arnold *et al.* 1999; Johansen-Morris and Latta 2006). Hybrid survival can  
73 play an important role in determining the effect of hybridization on the future composition of  
74 population, given that a hybrid can be a bridge for introgression or become a new species  
75 (Stukenbrock 2016; Grant and Grant 2019). By providing opportunities for gene flow  
76 between sister species, hybridization can cause a decrease or an increase (reinforcement) of  
77 reproductive barriers (Pickup *et al.* 2019).

78 Most flowering plant species are hermaphrodite, and therefore the formation of reciprocal  
79 hybrids is often possible, but these reciprocal hybrids do not always have the same  
80 performance (Christopher *et al.* 2019). Asymmetry in the fitness of reciprocal F<sub>1</sub> hybrids has  
81 been reported in many plant species (Tiffin *et al.* 2001; Turelli and Moyle 2007). This type of  
82 isolation, known as isolation asymmetry, is different from Dobzhansky–Muller

83 incompatibilities (DMIs) because the reciprocal  $F_1$  hybrids carry the same autosomal  
84 genotype (Turelli and Moyle 2007). The combination of two divergent genomes through  
85 hybridization will introduce immediate and profound genetic modifications and remodeling  
86 of parental gene expression in the  $F_1$ , which can cause genome shock and have wide effects  
87 on species establishment and diversification (Paun *et al.* 2007; Kerbs *et al.* 2017). Due to  
88 extrinsic or intrinsic factors, reciprocal hybrids may show differences in fitness and can be  
89 different from their parents in the same environment (Paun *et al.* 2007). According to  
90 Darwin's corollary to Haldane's rule, isolation asymmetry can be an outcome of different  
91 relative rates of evolution in the parents of the  $F_1$  hybrid (Turelli and Moyle 2007).

92 *Rhinanthus major* Ehrh. and *R. minor* L. (both  $2n = 2x = 22$ : Hambler (1954)) are annual  
93 plants in the Orobanchaceae family, occurring in a diverse range of open habitats (Westbury  
94 2004b; Ducarme *et al.* 2010). Both species are self-compatible, but a higher outcrossing rate  
95 has been documented for *R. major* (76%) in comparison with *R. minor* (13%; Ducarme and  
96 Wesselingh 2013). Both species are hemiparasites that take organic carbon and mineral  
97 nutrients from the root systems of their hosts, even though they are able to photosynthesise  
98 (Rümer *et al.* 2007). Their roots have found to be attached to nearly 50 plants species from 18  
99 families, but the most suitable hosts are members of the Poaceae and Fabaceae (Gibson and  
100 Watkinson 1991).

101 Seed germination as a first stage of plant transition to development phase is composed of a  
102 series of steps, from water absorbance to embryo development and digestion of the starch and  
103 protein reserves of the seed (Bentsink and Koornneef 2008). If seed germination is mainly  
104 controlled by dormancy (primary or secondary dormancy), this can provide the best timing  
105 for plant growth and development to reduce extrinsic mortality (Hoyle *et al.* 2015).

106 Differences in seed dormancy within the same species can place the earliest and the latest  
107 plant in different environments with different challenges and this can provide an opportunity

108 for adaptive divergence (Donohue *et al.* 2005; Hoyle *et al.* 2015). Naturally, seeds of  
109 *Rhinanthus* species have physiological dormancy that can be broken by several weeks of  
110 cold stratification (Westbury 2004; Ter Borg 2005; Marin *et al.* 2019). Under laboratory  
111 conditions, a significant difference in germination rate has repeatedly been observed  
112 between the reciprocal F<sub>1</sub> hybrids. The germination rate of hybrids formed on *R. major*  
113 (F<sub>1a</sub> hybrids) is only 5-30%, whereas hybrids formed with *R. minor* as the maternal species  
114 (F<sub>1m</sub> hybrids) is nearly 100%, often even better than the parental species (Kwak 1979;  
115 Champion-Bourget 1980; Natalis and Wesselingh 2012; Ducarme and Wesselingh 2013).  
116 However, this difference was not observed in a field experiment (Wesselingh *et al.* 2019),  
117 which seems to indicate that the experimental conditions used for germination in the  
118 laboratory are not representative for the germination behaviour of the hybrids under more  
119 natural conditions. Marin *et al.* (2019) have shown in *R. minor* that seed features related to  
120 quality such as germination capacity and seed vigor can play important role in plant  
121 emergence, establishment and performance. They also found that elongation and growth of *R.*  
122 *minor* embryo continued after seed dispersal. Anatomical studies of *R. major* showed that its  
123 seed contained a well-developed embryo before the start of stratification (Tiagi 1966).  
124 Gene expression undergoes important changes during seed development, and comparative  
125 studies of transcriptomes of seeds during dormancy and germination have helped scientists to  
126 understand the processes that are taking place. Among expression profiling technologies,  
127 RNA sequencing (RNA-Seq), a member of next-generation sequencing (NGS)  
128 technologies, is a comprehensively informative technique to monitor wide transcriptional  
129 changes during various stages of plant life. Therefore, we used RNA-Seq to study the  
130 genetic basis and transcriptional changes during germination of F<sub>1a</sub> and F<sub>1m</sub> hybrids.

131

132 **Material and methods**

133 **Plant materials and RNA extraction**

134 Hybrid seeds were produced by reciprocal hand pollination on plants grown from seed in the  
135 greenhouse in 2019, applying *R. major* pollen onto *R. minor* stigmas after emasculation to  
136 produce F<sub>1m</sub> hybrid seed, and *R. minor* pollen onto *R. major* stigmas for F<sub>1a</sub> hybrid seeds.  
137 Seeds were collected from dry capsules in June-July 2019 and stored at room temperature.  
138 Thirty seeds in three replicates from each cross type were placed in petri dishes for  
139 germination in a refrigerator ( $\pm 4^{\circ}\text{C}$ ) in October 2019. We checked the dishes regularly for  
140 germination, which was scored as soon as the radicle was visible. We sampled germinated  
141 seeds at an early stage, with less than 1 mm of the radicle protruding from the seed, and  
142 sampled non-germinated seeds at the same time, after 40 days and 60 days of stratification.  
143 RNA was extracted from seeds using the QIAGEN RNeasy Mini Kit (3 seeds per sample):  
144 non-germinated F<sub>1m</sub> (F1m\_40\_NG) and F<sub>1a</sub> seeds (F1a\_40\_NG) 40 days after the start of  
145 stratification, germinated F<sub>1m</sub> seeds after 40 days (F1m\_40\_G), germinated F<sub>1a</sub> seeds after 60  
146 days (F1a\_60\_G), and non-germinated F<sub>1a</sub> seeds after 60 days (F1a\_60\_NG). The columns  
147 used for RNA extraction were washed again by TE buffer and centrifuged for 5 minutes at  
148 10000 rpm to remove the DNA. The retrieved DNA was used for PCR (20  $\mu\text{l}$  final volume, 2  
149  $\mu\text{l}$  of 10 X buffer, 0.4 mM dNTPs, 1.5 mM MgCl<sub>2</sub>, 2.0 U Taq polymerase, 5 pM forward  
150 primer and 5 pM reverse primer) with species-specific primers  
151 (5' CACCCTGATTTCTCTTTCTTCAA, 5' TTAAGACCCCATAAAAAGGAGGA) and  
152 obtained PCR products were digested by RsaI enzyme to confirm if they were indeed hybrid  
153 (Wesselingh *et al.* 2019; Mirzaei and Wesselingh 2021). Finally, the RNA of 15 hybrid  
154 samples was sent to GENEWIZ for sequencing on Illumina NovaSeq (2\*150 bp) platform.  
155  
156 **De novo assembly and sequence annotation**

157 Preliminary quality checks of all sequenced samples were performed using FastQC and  
158 quality trimming and adaptor removal were done using Trimmomatic-0.39 (Bolger *et al.*  
159 2014). *In silico* normalization of reads was done using the normalization option in Trinity  
160 package and *de novo* transcriptome assembly was performed using three assemblers: Trinity  
161 (Grabherr *et al.* 2011), Trans-ABYSS (Robertson *et al.* 2010) and SPAdes-rna (Bushmanova  
162 *et al.* 2019). A first appraisal of the quality of the assembled transcriptomes was performed  
163 by estimating representation read counts in each assembly using bowtie2 (Langmead and  
164 Salzberg 2012). Transcriptome completeness was explored using BUSCO v.4.1.2  
165 (Benchmarking Universal Single Copy Orthologs) (Simão *et al.* 2015) to obtain the  
166 percentage of single-copy orthologues represented. Plotting of the BUSCO results was  
167 performed using the ggplot package in R v4.03 (R Core Team 2020). Functional annotation  
168 of transcriptome was conducted using the Trinotate (Bryant *et al.* 2017). Prediction of coding  
169 regions in transcripts and open reading frames (ORFs) were performed by TransDecoder  
170 v5.5.0 (Grabherr *et al.* 2011). UniProtKB/Swiss-Prot and plant NCBI NR (NCBI non-  
171 redundant protein database) databases were used for homology searches (Ye *et al.* 2006) and  
172 HMMER v.3 (Finn *et al.* 2011) and Pfam (Punta *et al.* 2012) were used for protein domain  
173 identification. Signal peptide predictions was obtained using signalP v.4.45 (Petersen *et al.*  
174 2011) and transmembrane regions were predicted using the tmHMM v.2.46 server (Krogh *et*  
175 *al.* 2001). Ribosomal RNA genes were detected with RNAMMER v.1.247 (Lagesen *et al.*  
176 2007) and finally annotation outputs were loaded into a Trinotate SQLite Database.

177

### 178 **Transcript abundance and differential expression analysis**

179 To estimate transcript abundance, we used the alignment-based RSEM as abundance  
180 estimation method. Therefore, we used bowtie2 for alignment, and the sorted alignment file  
181 in BAM format was generated by SAMtools-1.3.1 (Li *et al.* 2009) and used for RSEM

182 program (Li and Dewey 2011). Finally, a matrix of normalized expression values were  
183 estimated with the `abundance_estimates_to_matrix.pl` script in the Trinity package. The  
184 resulting matrix of normalized expression values was fed into the  
185 `count_matrix_features_given_MIN_TPM_threshold.pl` script for ExN50 analysis. The ExN50  
186 statistics was calculated by Trinity accessory scripts `contig_ExN50_statistic.pl` and plotted  
187 with `ggplot` in R. Differential expression was preformed using adapted pipeline in Trinity  
188 which included Bioconductor v3.4, edgeR v4.0 (Robinson *et al.* 2010), Limma (Ritchie *et al.*  
189 2015), ctc (Lucas and Jasson 2006), Biobase (Huber *et al.* 2015), gplots (Warnes *et al.* 2009).  
190 The transcript differential expression analysis was performed on the matrix of raw read  
191 counts using the edgeR R package. The false discovery rate raw *p*-values were adjusted for  
192 multiple comparisons by the Benjamini-Hochberg method (Haynes 2013). A false discovery  
193 rate [FDR] < 0.05 and  $|\log_2FC| \geq 2$  (positive or negative used for over- or under-expression,  
194 respectively) were used as criteria for identifying significant differences in expression. Gene  
195 set enrichment analyses of GO terms were conducted on each set of differentially expressed  
196 transcripts to determine over-represented functional pathways. GO enrichment analysis of  
197 differentially expressed (DE) genes was performed using Fisher exact test, P-value  $\leq 0.05$  and  
198 the hypergeometric Fisher exact test (P < 0.05) and Benjamini (FDR < 0.05) were used to  
199 detect statistically significant enrichment of the KEGG pathway (Kanehisa *et al.* 2016).

200

## 201 **Results**

### 202 **Germination and RNA-sequencing**

203 In the  $F_{1m}$  hybrid seeds, germination started after 34 days and after 70 days 90% of seeds had  
204 germinated. On the contrary,  $F_{1a}$  hybrid seeds started to germinate after 39 days and even  
205 after 120 days in the refrigerator the germination rate was still under 17%. The mRNA  
206 libraries of the five treatments generated over ~296 million raw paired-end reads, out of



207 which ~263 million high quality paired-end reads ( $Q \geq 20$ ) remained with ~17.53 million  
208 reads per sample. The final lengths of remaining reads were between 36 and 151bp, with a  
209 GC content of approximately 48% in all samples (Supplementary Data Table S1).

210

## 211 **Assembly**

212 The Trinity assembly, with more complete reads (91.8%) and a higher representation of  
213 sequenced reads (97.53%) had a better quality in comparison with the two other assemblies  
214 (Table 1). The total length of assembled reads, number of transcripts and the N50 index of  
215 Trinity assembly were also higher than in the Trans-ABYSS and SPAdes-rna assemblies.  
216 Therefore we used the Trinity assembly for further analysis.

217 The Trinity assembly contained a total of 356379 transcripts (206,255 trinity genes) with an  
218 average length of 861bp and N50 value of 1,558bp (Table 1). The lengths of the assembled  
219 transcripts ranged from 200 to 22,700 bp and about 74.34% of the transcripts were in the  
220 range of 201–1000 bp (~1 kb), 23.98% transcripts were 1001–4000 bp (1.1 to 4.0 kb) and  
221 1.68% was longer than 4001 bp (>3 kb) (Supplementary Data Fig. S1). Plotting transcript  
222 expression (Ex) against ExN50 value-as another overall quality checking of assembly-  
223 revealed that saturation point of the assembly was at 92% of the total expression with length  
224 of 1884 bp (Supplementary Data Fig. S2). According to ExN50 value, deeper sequencing is  
225 very unlikely to provide longer reads for our transcriptomes (Supplementary Data Fig. S2).

226

## 227 **Annotation**

228 In total 173,638 ORFs were predicted, including: 92241 (53.12%) as complete ORFs  
229 contained a starting codon for methionine and ending stop codon, 32193 (18.54%) as 5'  
230 partial ORF which lacked the start codon, 18825 (10.84%) as 3'-partial ORF and 30329  
231 (17.46%) as internal ORF which were partial at both 5' and 3'. Nearly 78% of the ORFs and

232 66% of the transcripts were matched with the Swiss-Prot database and 58% with the plant NR  
233 database. Homologous genes with high probability scores were found for 58.03% (100775) of  
234 predicted ORFs. Taxonomic homology search of ORFs revealed that the highest similarity  
235 (5%) of the ORFs matched with *Capsicum annuum* (Solanaceae) and *Gossypium raimondii*  
236 (Malvaceae) and only 2% (2157) with *Striga asiatica* from Orobanchaceae family  
237 (Supplementary Data Table S2).

238

### 239 **Differential gene expression analysis**

240 A preliminary comparison of replicates across all samples was performed using a PCA on  
241 normalized read counts (Fig. 1). The first principal component, which explained 27.80% of  
242 the observed variation, clearly separated the two reciprocal hybrids. The second component  
243 (13.5%) allowed to distinguish between germinated and non-germinated seeds of the F<sub>1a</sub>  
244 hybrid. A clear separation between 40 and 60 days of stratification for the non-germinated F<sub>1a</sub>  
245 hybrid seeds is visible on the third principal axis (11.93%). Correlation analysis of  
246 differentially expressed (DE) genes clearly revealed two groups, again corresponding to the  
247 two reciprocal hybrids (Fig. 2).

248 The highest number of DE genes (4165) was detected between non-germinated F<sub>1a</sub> seeds at  
249 40 days and germinated F<sub>1a</sub> seed at 60 days with respectively 1634 and 2531 upregulated  
250 genes (Table 2; Fig. 3; Supplementary Data Tables S5). Forty-three upregulated genes such  
251 as phytochrome B (phyB), NAC domain-containing protein, and oil body-associated proteins  
252 were shared among non-germinated seeds, while 399 shared upregulated genes were  
253 observed in germinated seeds (Fig. 3).

254 In total 176380 (49.50%) and 167885 (47.10%) transcripts were assigned to GO terms and  
255 KEGG pathways, respectively. GO enrichment analysis of DE genes in the non-germinated  
256 seeds assigned them into 71, 81 and 70 significant GO functional groups, respectively, within

257 three main categories: molecular function, biological process, and cellular components  
258 (Supplementary Data Tables S3). The GO molecular function category related to nutrient  
259 reservoir activity (GO:0045735) and oxidoreductase activity (GO:0016491), with the highest  
260 number of upregulated genes that were significantly enriched in F<sub>1a</sub>\_40\_NG vs F<sub>1a</sub>\_60\_G and  
261 in F<sub>1a</sub>\_60\_G vs F<sub>1a</sub>\_40\_NG (Fig. 4A, 4B). Alcohol dehydrogenase (NAD<sup>+</sup>) activity  
262 (GO:0004022) and oxidoreductase activity (GO:0016491) were found to be significantly  
263 enriched in F<sub>1m</sub>\_40\_NG vs F<sub>1m</sub>\_40\_G upregulated genes (Fig. 4C). In terms of biological  
264 process, response to salt stress (GO:0009651) and oxidation-reduction process (GO:0055114)  
265 were enriched in F<sub>1m</sub>\_40\_NG vs F<sub>1m</sub>\_40\_G, with the highest number of upregulated genes,  
266 whereas among the upregulated genes in F<sub>1a</sub>\_40\_NG (Fig. 4A, 4B, 4C) we did not have any  
267 candidates in terms of biological process and cellular components. In terms of cellular  
268 components, extracellular region (GO:0005576) was shared between F<sub>1a</sub>\_60\_G and  
269 F<sub>1m</sub>\_40\_G (Supplementary Data Tables S3).

270 In total 20 unique KEGG pathways displayed significant changes (P-value ≤0.05) in all  
271 compared treatments. “Metabolic pathways”, “plant hormone signal transduction” and  
272 “biosynthesis of secondary metabolites” were represented among all the treatments.  
273 “Ubiquitin mediated proteolysis” and “amino sugar and nucleotide sugar metabolism”  
274 pathways were also common between F<sub>1a</sub>\_60\_NG vs F<sub>1a</sub>\_60\_G and F<sub>1a</sub>\_40\_NG vs F<sub>1a</sub>\_60\_G  
275 treatments. “Linoleic acid metabolism” and “starch and sucrose metabolism” pathways were  
276 found to be unique in F<sub>1m</sub>\_40\_NG vs F<sub>1m</sub>\_40\_G (Fig. 5; Supplementary Data Table S4).

277

## 278 **Discussion**

279 Overall, the gene expression profiles differed markedly between the two reciprocal hybrids,  
280 both before and after germination. Within the F<sub>1a</sub> hybrids, the differences in gene expression

281 between germinated and non-germinated seeds were stronger than for the  $F_{1m}$  hybrid seeds,  
282 and they also changed over the course of the stratification period.

283

#### 284 **DE genes related to seed development and osmotic stresses**

285 Among the upregulated genes in the non-germinated  $F_{1a}$  seeds in comparison with the  
286 germinated seeds, peroxidase activity, peroxiredoxin activity and nutrient reservoir activity  
287 were common. Plant peroxidases, mostly known for reactive oxygen species (ROS)  
288 metabolism, are broadly active in various stages of plant life, from plant development to seed  
289 germination (Syros *et al.* 2005). ROS can cause oxidation damage to cell components, but  
290 recently it has been proven that ROS can play a key signaling role during germination or  
291 dormancy release (Oracz *et al.* 2007; Sarath *et al.* 2007; El-Maarouf-Bouteau and Bailly  
292 2008). One of the sources of ROS in plant cells is peroxisome (glyoxysome) activity  
293 (Sandalo and Romero-Puertas 2015). The most significantly enriched upregulated genes in  
294 the non-germinated  $F_{1a}$  seeds after 60 days were related to glyoxysome, malate synthase  
295 activity and the glyoxylate cycle. Peroxiredoxin (Prx) proteins are types of plant antioxidants  
296 that protect lipids, enzymes, and DNA against ROS (Rouhier *et al.* 2001). During late seed  
297 development and dormancy in mature seeds they are highly expressed, and by sensing harsh  
298 conditions they are involved in the maintenance of dormancy while protecting the embryo  
299 from damage caused by ROS (Haslekås *et al.* 2003). It has been shown that Prx genes are up-  
300 regulated by ABA and osmotic stresses during dormancy and suppressed by gibberellic acid  
301 upon germination (Aalen 1999). A recent study in *Arabidopsis thaliana* has shown that  
302 *AtPER1*, a seed-specific peroxiredoxin, is involving in enhancing primary seed dormancy by  
303 eliminating ROS to suppress ABA catabolism and GA biosynthesis (Chen *et al.* 2020). The  
304 numbers of upregulated genes related to nutrient reservoir activity, which provides the  
305 proteins required for the development or growth of seeds, were high in non-germinated  $F_{1a}$

306 seeds, both after 40 and 60 days, whereas only one gene from this category (*VCL21*) was  
307 highly expressed in the non-germinated seeds of the reciprocal  $F_{1m}$  hybrid at 40 days.  
308 Additionally, GO enrichment resulted in significant representation of rRNA N-glycosylase  
309 activity genes in the non-germinated  $F_{1a}$  seeds after 40 days. rRNA N-glycosylase activity is  
310 a type of toxic activity which depurinates rRNAs and arrests protein synthesis during  
311 translation. They have been widely detected in plants and mainly act as antifungal,  
312 antibacterial and antiviral agents (Sharma *et al.* 2004; Zhu *et al.* 2018). Glutathionylation  
313 activity protects cells against oxidative stress, especially heavy metal stress, and is also  
314 involved in many other processes, including cell cycle and cell differentiation, symbiosis and  
315 flowering (Rouhier *et al.* 2008; Gao *et al.* 2009; Yadav 2010). Nine genes related to this  
316 activity were upregulated after 60 days in non-germinated  $F_{1a}$  seeds. It has been shown that  
317 this protein is involved in post-translational modification under oxidative stress conditions and  
318 can act as a redox signaling mechanism for helping the cells to sense and signal harmful  
319 stress conditions and trigger appropriate responses against stress (Gao *et al.* 2009). Alongside  
320 the common GO term enrichment for upregulated genes in the non-germinated  $F_{1a}$  seeds in  
321 comparison with the germinated  $F_{1a}$  seeds, we found the gibberellic acid-mediated signaling  
322 pathway, response to gibberellin and negative regulation of gibberellic acid-mediated  
323 signaling pathway GO enrichment only after 60 days in the non-germinated  $F_{1a}$  seeds.

324

### 325 **DE genes related to phytohormone signal transduction**

326 Maintenance and release of dormancy depend on the intrinsic balance between abscisic acid  
327 (ABA) and gibberellic acid (GA). While the maintenance of dormancy depends on high  
328 ABA/GA ratios, release of dormancy implies an increased biosynthesis of GA and  
329 degradation of ABA, resulting in low ABA/GA ratios (Kermode 2005). The enrichment  
330 pattern in non-germinated  $F_{1a}$  seeds after 60 days showed an increase in the abundance of

331 enzymes and proteins associated with the gibberellic acid-mediated signaling pathway and  
332 response to gibberellin in comparison to 40 days. In contrast, genes related to the negative  
333 regulation of the gibberellic acid-mediated signaling pathway and response to salt stress were  
334 highly abundant in non-germinated  $F_{1a}$  seeds after 60 days. These genes, like membrane-  
335 bound NAC transcription factor (*NTL8*), gibberellin 2-oxidases (*GA2oxs*) and ABSCISIC  
336 ACID-INSENSITIVE 5 (*ABI5*) are likely to be linked to the maintenance of dormancy in  
337 these seeds (Kim *et al.* 2008; Lo *et al.* 2008; Kim and Park 2008). NAC transcription factors  
338 (*NTLs*) are related to the stress response and they have negative regulatory effects on seed  
339 germination (Kim *et al.* 2007; Kim and Park 2008). *GA2oxs* through 2 $\beta$ -hydroxylation can  
340 inactivate GA and increase the ABA/GA ratio (Sakamoto *et al.* 2004). *ABI5* from bZIP  
341 transcription factor family has a key role in ABA signaling and inhibiting seed germination  
342 (Finkelstein and Lynch 2000).

343 All of the enriched KEGG pathways for DE genes in non-germinated  $F_{1a}$  seeds after 60 days  
344 were shared with the same class after 40 days. After 40 days, however, there were 13 more  
345 enriched pathways compared to germinated  $F_{1a}$  seeds after 60 days, and they were related to  
346 lipid metabolism, arginine biosynthesis and glutathione metabolism. Genes clustered in this  
347 pathway were mainly upregulated in both germinated and non-germinated seeds after 60  
348 days. Genes related to the “circadian rhythm” pathway were only enriched in upregulated  
349 genes in germinated seeds ( $F_{1m}$  after 40 days and  $F_{1a}$  after 60 days). Although “metabolic  
350 pathways” and “biosynthesis of secondary metabolites” were also quite abundant in the other  
351 treatments, here we mainly focused on “plant hormone signal transduction” pathway.

352 Phytohormones like GAs promote germination but ABA and Auxin (Aux) are hormones  
353 known to induce and maintain seed dormancy (Liu *et al.* 2013; Tuan *et al.* 2018). In  
354 germinated  $F_{1a}$  seeds, upregulation of Auxin transporter protein 1 (*AUX1*) and Auxin/Indole-  
355 3-Acetic Acid (*Aux/IAA*) was detected, while in non-germinated  $F_{1a}$  seeds an upregulation of

356 Transport inhibitor response 1 (*TIR1*) was observed. Studies have shown that Aux/IAA  
357 proteins act as positive regulators during seed germination and *TIR1* act as negative regulator  
358 for germination (Liu *et al.* 2013; Hussain *et al.* 2020). Aux/IAA protein abundance during  
359 germination will promote germination through the inhibition of *ABI3* transcription (Hussain  
360 *et al.* 2020). Upregulation of *ABI5* was observed in all of the non-germinated seeds and in  
361 non-germinated F<sub>1a</sub> seeds at 40 days there was an abundance of pyrabactin resistance  
362 1(PYR1)/PYR1-like2 (*PYL2*), *PYL4* and *GAI* with *RGA* (members of the DELLA  
363 superfamily). *PYL* receptors are in the ABA signaling pathway and DELLA proteins are key  
364 negative regulators of the GA signaling pathway. It has been shown that a high abundance of  
365 these genes can induce dormancy and prevent germination (Tyler *et al.* 2004; Tuan *et al.*  
366 2018). The high abundance of *ABI5* and members of the DELLA superfamily in non-  
367 germinated seeds could be the main reason of low germination rate of F<sub>1a</sub> seeds, since we also  
368 detected a high expression of *ABI5* in non-germinated F<sub>1m</sub> seeds after 40 days.

369

### 370 **Maternal effects on F<sub>1</sub> germination**

371 Large differences in gene expression were observed when we compared F<sub>1</sub> germinated and  
372 non-germinated seeds with different maternal parents in comparison with groups sharing the  
373 same maternal parent species. The reciprocal F<sub>1</sub> seeds differed in the number of days to  
374 germination and in the final germination percentage, and this was also conspicuous in the  
375 gene expression analysis, which showed clear maternal effects, leading to a prolonged  
376 dormancy in the hybrids with *R. major* as the maternal parent.

377 We only found differential gene expression for nuclear genes, not for mitochondrial or  
378 chloroplast genes. Dormancy, germination and seedling establishment can be maternally  
379 controlled through maternal tissues surrounding the embryo, such as the endosperm and seed  
380 coat (Debeaujon *et al.* 2007; Piskurewicz *et al.* 2016). Maternal effects can be caused by the

381 maternal environment and by the maternal genome (Chiang *et al.* 2011; Fernández  
382 Farnocchia *et al.* 2019). The parents of our F<sub>1</sub> hybrids were grown simultaneously in the  
383 same conditions and with the same host plant species, so the observed maternal effects are  
384 most likely maternal genetic effects. Even in germinated seeds, we found strong differences  
385 in gene expression between the reciprocal hybrids, which indicates the potential long-term  
386 nature of these maternal effects.

387 Although differences in gene expression patterns were clear between the reciprocal hybrids,  
388 we cannot yet pinpoint which pathway or mechanism is the trigger of the prolonged  
389 dormancy observed. A possible explanation could lie in embryo development before  
390 stratification. Embryo morphology has strong effects on dormancy and germination, and  
391 seeds with morphological dormancy require a period of ripening or embryo maturation prior  
392 to germination (Forbis *et al.* 2002). *Rhinanthus* seeds collected directly fruit ripening have a  
393 low germination percentage (Ter Borg 2005), suggesting that these also need a period of  
394 after-ripening. Marin *et al.* (2019) found that *R. minor* seeds from seed lots with smaller  
395 embryos (relative to endosperm size) germinated more slowly. If F<sub>1a</sub> hybrid seeds have  
396 smaller embryos that are relatively underdeveloped, this could be a potential mechanism that  
397 delays germination. This would require a study of embryo size and gene expression directly  
398 after seed formation and during after-ripening.

399 Studies have revealed that epigenetic process like DNA methylation, histone modifications,  
400 and small RNAs play an important role in the different stages of seed development, including  
401 embryogenesis, seed maturation, and germination (Greaves *et al.* 2015; Wang and Köhler  
402 2017; Eriksson *et al.* 2020). This contribution of epigenetic regulation has also been reported  
403 in the fitness of F<sub>1</sub> hybrids and heterosis or hybrid vigour (Groszmann *et al.* 2013; Greaves *et*  
404 *al.* 2015). The dormancy of seed can be effected by epigenetic process: it has been shown in  
405 *Arabidopsis* that dormancy levels are inherited from the mother through inactivation of the



406 paternal allele of the promoter region of allantoinase (*ALN*) gene by DNA methylation  
407 (Iwasaki *et al.* 2019). It seems likely that internal factors, including plant hormones and  
408 embryo development, in combination with epigenetic changes may explain the difference in  
409 germination behaviour of the *Rhinanthus* reciprocal F<sub>1</sub> hybrids.

410

#### 411 **Supplementary data**

412 Supplementary data are available online at <https://academic.oup.com/aob> and consist of the  
413 following. Figure S1: the length distribution of assembled transcriptomes of F1 seeds. Figure  
414 S2: expression percentage by N50 (ExN50) calculated as a fraction of the total expressed data  
415 (Ex). Figure S3: GO pathway enrichment analysis based on upregulated genes in F1a\_60\_NG  
416 resulted from comparison of F1a\_40\_NG vs F1a\_60\_NG. Figure S4: KEGG pathway  
417 enrichment of DE genes in F1a\_60\_NG vs F1a\_60\_G, F1a\_40\_NG vs F1a\_60\_G and  
418 F1m\_40\_NG vs F1m\_40\_G comparisons. Table S1: Number of sequenced reads per samples  
419 and number of high quality reads have been used for assembly and DE analysis. Table S2:  
420 Significant BLASTp matches of obtained ORFs with other plant species. Table S3: GO terms  
421 classification of DE transcripts in F1a\_60\_NG vs F1a\_60\_G, F1a\_40\_NG vs F1a\_60\_G and  
422 F1m\_40\_NG vs F1m\_40\_G comparisons. Table S4: KEGG pathway enrichment results of  
423 DE genes in F1a\_60\_NG vs F1a\_60\_G, F1a\_40\_NG vs F1a\_60\_G and F1m\_40\_NG vs  
424 F1m\_40\_G. Table S5: Number of differentially expressed transcripts in all treatment  
425 comparisons

426

427

428

429 **Acknowledgements**

430 This is publication no. BRC375 of the Biodiversity Research Centre of UCLouvain.

431 Computational resources have been provided by the supercomputing facilities of UCLouvain  
432 (CISM/UCL) and the Consortium des Équipements de Calcul Intensif en Fédération Wallonie  
433 Bruxelles (CÉCI) funded by the Fonds de la Recherche Scientifique de Belgique (F.R.S.-  
434 FNRS) under convention 2.5020.11 and by the Walloon Region.

435  
436 **Funding**

437 This work was supported by the Fonds Spéciaux de Recherche of UCLouvain (FSR project  
438 2016).

439  
440  
441 **References**

- 442  
443 **Aalen RB. 1999.** Peroxiredoxin antioxidants in seed physiology. *Seed Science Research* **9**:  
444 285–295.
- 445 **Arnold ML, Bulger MR, Burke JM, Hempel AL, Williams JH. 1999.** Natural  
446 hybridization: how low can you go and still be important? *Ecology* **80**: 371–381.
- 447 **Bentsink L, Koornneef M. 2008.** Seed dormancy and germination. *The Arabidopsis Book* **6**:  
448 e0119.
- 449 **Bolger AM, Lohse M, Usadel B. 2014.** Trimmomatic: a flexible trimmer for Illumina  
450 sequence data. *Bioinformatics* **30**: 2114–2120.
- 451 **Bryant DM, Johnson K, DiTommaso T, et al. 2017.** A tissue-mapped axolotl de novo  
452 transcriptome enables identification of limb regeneration factors. *Cell Reports* **18**: 762–776.
- 453 **Bushmanova E, Antipov D, Lapidus A, Prjibelski AD. 2019.** rnaSPAdes: a de novo  
454 transcriptome assembler and its application to RNA-Seq data. *GigaScience* **8**.
- 455 **Campion-Bourget F. 1980.** L'autogamie et l'allogamie chez les cinq principales espèces de  
456 *Rhinanthus* L. de France. *Revue de Cytologie et de Biologie végétales - le Botaniste* **3**: 199–  
457 219.
- 458 **Chen H, Ruan J, Chu P, et al. 2020.** AtPER1 enhances primary seed dormancy and reduces  
459 seed germination by suppressing the ABA catabolism and GA biosynthesis in *Arabidopsis*  
460 seeds. *The Plant Journal* **101**: 310–323.

- 461 **Chiang GCK, Bartsch M, Barua D, et al. 2011.** DOG1 expression is predicted by the seed-  
462 maturation environment and contributes to geographical variation in germination in  
463 *Arabidopsis thaliana*. *Molecular Ecology* **20**: 3336–3349.
- 464 **Christopher DA, Mitchell RJ, Trapnell DW, Smallwood PA, Semski WR, Karron JD.**  
465 **2019.** Hermaphroditism promotes mate diversity in flowering plants. *American Journal of*  
466 *Botany* **106**: 1131–1136.
- 467 **Debeaujon I, Lepiniec L, Pourcel L, Routaboul J-M. 2007.** Seed coat development and  
468 dormancy In: Bradford KJ, Nonogaki H (eds) *Annual Plant Reviews Volume 27: Seed*  
469 *Development, Dormancy and Germination*. Blackwell Publishing, Oxford, 25–49.
- 470 **Donohue K, Dorn L, Griffith C, et al. 2005.** Niche construction through germination  
471 cueing: life-history responses to timing of germination in *Arabidopsis thaliana*. *Evolution* **59**:  
472 771–785.
- 473 **Ducarme V, Vrancken J, Wesselingh RA. 2010.** Hybridization in annual plants: patterns  
474 and dynamics during a four-year study in mixed *Rhinanthus* populations. *Folia Geobotanica*  
475 **45**: 387–405.
- 476 **Ducarme V, Wesselingh RA. 2013.** Outcrossing rates in two self-compatible, hybridising  
477 *Rhinanthus* species: implications for hybrid formation. *Plant Biology* **15**: 541–547.
- 478 **El-Maarouf-Bouteau H, Bailly C. 2008.** Oxidative signaling in seed germination and  
479 dormancy. *Plant Signaling & Behavior* **3**: 175–182.
- 480 **Eriksson MC, Szukala A, Tian B, Paun O. 2020.** Current research frontiers in plant  
481 epigenetics: an introduction to a virtual issue. *New Phytologist* **226**: 285–288.
- 482 **Fernández Farnocchia RB, Benech-Arnold RL, Batlla D. 2019.** Regulation of seed  
483 dormancy by the maternal environment is instrumental for maximizing plant fitness in  
484 *Polygonum aviculare*. *Journal of Experimental Botany* **70**: 4793–4806.
- 485 **Finkelstein RR, Lynch TJ. 2000.** The *Arabidopsis* abscisic acid response gene *ABI5*  
486 encodes a basic leucine zipper transcription factor. *The Plant Cell* **12**: 599–609.
- 487 **Finn RD, Clements J, Eddy SR. 2011.** HMMER web server: interactive sequence similarity  
488 searching. *Nucleic Acids Research* **39**: W29–W37.
- 489 **Forbis TA, Floyd SK, de Queiroz A. 2002.** The evolution of embryo size in angiosperms  
490 and other seed plants: implications for the evolution of seed dormancy. *Evolution* **56**: 2112–  
491 2125.
- 492 **Gao X-H, Bedhomme M, Veyel D, Zaffagnini M, Lemaire SD. 2009.** Methods for analysis  
493 of protein glutathionylation and their application to photosynthetic organisms. *Molecular*  
494 *Plant* **2**: 218–235.
- 495 **Gibson CC, Watkinson AR. 1991.** Host selectivity and the mediation of competition by the  
496 root hemiparasite *Rhinanthus minor*. *Oecologia* **86**: 81–87.
- 497 **Grabherr MG, Haas BJ, Yassour M, et al. 2011.** Trinity: reconstructing a full-length  
498 transcriptome without a genome from RNA-Seq data. *Nature Biotechnology* **29**: 644–652.

- 499 **Grant PR, Grant BR. 2019.** Hybridization increases population variation during adaptive  
500 radiation. *Proceedings of the National Academy of Sciences* **116**: 23216–23224.
- 501 **Greaves IK, Gonzalez-Bayon R, Wang L, et al. 2015.** Epigenetic changes in hybrids. *Plant*  
502 *Physiology* **168**: 1197–1205.
- 503 **Groszmann M, Greaves IK, Fujimoto R, James Peacock W, Dennis ES. 2013.** The role of  
504 epigenetics in hybrid vigour. *Trends in Genetics* **29**: 684–690.
- 505 **Hamblen DJ. 1954.** Cytology of the Scrophulariaceae and Orobanchaceae. *Nature* **174**: 838.
- 506 **Haslekås C, Viken MK, Grini PE, et al. 2003.** Seed 1-cysteine peroxiredoxin antioxidants  
507 are not involved in dormancy, but contribute to inhibition of germination during stress. *Plant*  
508 *Physiology* **133**: 1148–1157.
- 509 **Haynes W. 2013.** Benjamini–Hochberg method in: Dubitzky W, Wolkenhauer O, Cho K-H,  
510 Yokota H, eds. *Encyclopedia of Systems Biology*. New York, NY: Springer, 78–78.
- 511 **Hoyle GL, Steadman KJ, Good RB, McIntosh EJ, Galea LME, Nicotra AB. 2015.** Seed  
512 germination strategies: an evolutionary trajectory independent of vegetative functional traits.  
513 *Frontiers in Plant Science* **6**.
- 514 **Huber W, Carey VJ, Gentleman R, et al. 2015.** Orchestrating high-throughput genomic  
515 analysis with Bioconductor. *Nature Methods* **12**: 115–121.
- 516 **Hussain S, Kim SH, Bahk S, et al. 2020.** The auxin signaling repressor IAA8 promotes seed  
517 germination through down-regulation of ABI3 transcription in *Arabidopsis*. *Frontiers in*  
518 *Plant Science* **11**.
- 519 **Iwasaki M, Hyvärinen L, Piskurewicz U, Lopez-Molina L. 2019.** Non-canonical RNA-  
520 directed DNA methylation participates in maternal and environmental control of seed  
521 dormancy. *eLife* **8**: e37434.
- 522 **Johansen-Morris AD, Latta RG. 2006.** Fitness consequences of hybridization between  
523 ecotypes of *Avena barbata*: hybrid breakdown, hybrid vigor, and transgressive segregation.  
524 *Evolution* **60**: 1585–1595.
- 525 **Kanehisa M, Sato Y, Kawashima M, Furumichi M, Tanabe M. 2016.** KEGG as a  
526 reference resource for gene and protein annotation. *Nucleic Acids Research* **44**: D457–D462.
- 527 **Kerbs B, Ressler J, Kelly JK, et al. 2017.** The potential role of hybridization in  
528 diversification and speciation in an insular plant lineage: insights from synthetic interspecific  
529 hybrids. *AoB PLANTS* **9**.
- 530 **Kermode AR. 2005.** Role of abscisic acid in seed dormancy. *Journal of Plant Growth*  
531 *Regulation* **24**: 319–344.
- 532 **Kim S-Y, Kim S-G, Kim Y-S, et al. 2007.** Exploring membrane-associated NAC  
533 transcription factors in *Arabidopsis*: implications for membrane biology in genome  
534 regulation. *Nucleic Acids Research* **35**: 203–213.

- 535 **Kim S-G, Lee A-K, Yoon H-K, Park C-M. 2008.** A membrane-bound NAC transcription  
536 factor NTL8 regulates gibberellic acid-mediated salt signaling in *Arabidopsis* seed  
537 germination. *The Plant Journal* **55**: 77–88.
- 538 **Kim S-G, Park C-M. 2008.** Gibberellic acid-mediated salt signaling in seed germination.  
539 *Plant Signaling & Behavior* **3**: 877–879.
- 540 **Krogh A, Larsson B, von Heijne G, Sonnhammer ELL. 2001.** Predicting transmembrane  
541 protein topology with a hidden Markov model: application to complete genomes. *Journal of*  
542 *Molecular Biology* **305**: 567–580.
- 543 **Kwak MM. 1979.** Effects of bumblebee visits on the seed set of *Pedicularis*, *Rhinanthus* and  
544 *Melampyrum* (Scrophulariaceae) in the Netherlands. *Acta Botanica Neerlandica* **28**: 177–  
545 195.
- 546 **Lagesen K, Hallin P, Rødland EA, Stærfeldt H-H, Rognes T, Ussery DW. 2007.**  
547 RNAMmer: consistent and rapid annotation of ribosomal RNA genes. *Nucleic Acids*  
548 *Research* **35**: 3100–3108.
- 549 **Langmead B, Salzberg SL. 2012.** Fast gapped-read alignment with Bowtie 2. *Nature*  
550 *Methods* **9**: 357–359.
- 551 **Li B, Dewey CN. 2011.** RSEM: accurate transcript quantification from RNA-Seq data with  
552 or without a reference genome. *BMC Bioinformatics* **12**: 323.
- 553 **Li H, Handsaker B, Wysoker A, et al. 2009.** The sequence alignment/map format and  
554 SAMtools. *Bioinformatics* **25**: 2078–2079.
- 555 **Liu X, Zhang H, Zhao Y, et al. 2013.** Auxin controls seed dormancy through stimulation of  
556 abscisic acid signaling by inducing ARF-mediated ABI3 activation in *Arabidopsis*.  
557 *Proceedings of the National Academy of Sciences* **110**: 15485–15490.
- 558 **Lo S-F, Yang S-Y, Chen K-T, et al. 2008.** A novel class of gibberellin 2-oxidases control  
559 semidwarfism, tillering, and root development in rice. *The Plant Cell* **20**: 2603–2618.
- 560 **Lucas A, Jasson S. 2006.** Using amap and ctc packages for huge clustering. *R News*: 58–60.
- 561 **Marin M, Laverack G, Matthews S, Powell AA. 2019a.** Germination characteristics of  
562 *Rhinanthus minor* influence field emergence, competitiveness and potential use in restoration  
563 projects. *Plant Biology* **21**: 470–479.
- 564 **Mirzaei K, Wesselingh RA. 2021.** Development of a large set of diagnostic SNP markers  
565 using ddRAD-seq to study hybridization in *Rhinanthus major* and *R. minor*  
566 (*Orobanchaceae*). *Conservation Genetics Resources* **13**: 31–33.
- 567 **Natalis LC, Wesselingh RA. 2012.** Post-pollination barriers and their role in asymmetric  
568 hybridization in *Rhinanthus* (*Orobanchaceae*). *American Journal of Botany* **99**: 1847–1856.
- 569 **Oracz K, Bouteau HE-M, Farrant JM, et al. 2007.** ROS production and protein oxidation  
570 as a novel mechanism for seed dormancy alleviation. *The Plant Journal* **50**: 452–465.

- 571 **Paun O, Fay MF, Soltis DE, Chase MW. 2007.** Genetic and epigenetic alterations after  
572 hybridization and genome doubling. *Taxon* **56**: 649–56.
- 573 **Petersen TN, Brunak S, von Heijne G, Nielsen H. 2011.** SignalP 4.0: discriminating signal  
574 peptides from transmembrane regions. *Nature Methods* **8**: 785–786.
- 575 **Pickup M, Brandvain Y, Fraïsse C, et al. 2019.** Mating system variation in hybrid zones:  
576 facilitation, barriers and asymmetries to gene flow. *The New Phytologist* **224**: 1035–1047.
- 577 **Piskurewicz U, Iwasaki M, Susaki D, Megies C, Kinoshita T, Lopez-Molina L. 2016.**  
578 Dormancy-specific imprinting underlies maternal inheritance of seed dormancy in  
579 *Arabidopsis thaliana*. *eLife* **5**.
- 580 **Punta M, Coggill PC, Eberhardt RY, et al. 2012.** The Pfam protein families database.  
581 *Nucleic Acids Research* **40**: D290–D301.
- 582 **R Core Team. 2020.** R: A language and environment for statistical computing. R Foundation  
583 for Statistical Computing, Vienna, Austria. URL <http://www.R-project.org/>
- 584 **Rieseberg LH. 1997.** Hybrid origins of plant species. *Annual Review of Ecology and*  
585 *Systematics* **28**: 359–389.
- 586 **Ritchie ME, Phipson B, Wu D, et al. 2015.** Limma powers differential expression analyses  
587 for RNA-sequencing and microarray studies. *Nucleic Acids Research* **43**: e47–e47.
- 588 **Robertson G, Schein J, Chiu R, et al. 2010.** De novo assembly and analysis of RNA-seq  
589 data. *Nature Methods* **7**: 909–912.
- 590 **Robinson MD, McCarthy DJ, Smyth GK. 2010.** edgeR: a Bioconductor package for  
591 differential expression analysis of digital gene expression data. *Bioinformatics* **26**: 139–140.
- 592 **Rouhier N, Gelhaye E, Sautiere P-E, et al. 2001.** Isolation and characterization of a new  
593 peroxiredoxin from poplar sieve tubes that uses either glutaredoxin or thioredoxin as a proton  
594 donor. *Plant Physiology* **127**: 1299–1309.
- 595 **Rouhier N, Lemaire SD, Jacquot J-P. 2008.** The role of glutathione in photosynthetic  
596 organisms: emerging functions for glutaredoxins and glutathionylation. *Annual Review of*  
597 *Plant Biology* **59**: 143–166.
- 598 **Rümer S, Cameron DD, Wacker R, Hartung W, Jiang F. 2007.** An anatomical study of  
599 the haustoria of *Rhinanthus minor* attached to roots of different hosts. *Flora - Morphology,*  
600 *Distribution, Functional Ecology of Plants* **202**: 194–200.
- 601 **Sakamoto T, Miura K, Itoh H, et al. 2004.** An overview of gibberellin metabolism enzyme  
602 genes and their related mutants in rice. *Plant Physiology* **134**: 1642–1653.
- 603 **Sandalio LM, Romero-Puertas MC. 2015.** Peroxisomes sense and respond to  
604 environmental cues by regulating ROS and RNS signalling networks. *Annals of Botany* **116**:  
605 475–485.
- 606 **Sarath G, Hou G, Baird LM, Mitchell RB. 2007.** Reactive oxygen species, ABA and nitric  
607 oxide interactions on the germination of warm-season C<sub>4</sub>-grasses. *Planta* **226**: 697–708.

- 608 **Sharma N, Park S-W, Vepachedu R, et al. 2004.** Isolation and characterization of an RIP  
609 (ribosome-inactivating protein)-like protein from tobacco with dual enzymatic activity. *Plant*  
610 *Physiology* **134**: 171–181.
- 611 **Simão FA, Waterhouse RM, Ioannidis P, Kriventseva EV, Zdobnov EM. 2015.** BUSCO:  
612 assessing genome assembly and annotation completeness with single-copy orthologs.  
613 *Bioinformatics* **31**: 3210–3212.
- 614 **Stukenbrock EH. 2016.** The role of hybridization in the evolution and emergence of new  
615 fungal plant pathogens. *Phytopathology* **106**: 104–112.
- 616 **Syros TD, Yupsanis TA, Economou AS. 2005.** Expression of peroxidases during seedling  
617 growth in *Ebenus cretica* L. as affected by light and temperature treatments. *Plant Growth*  
618 *Regulation* **46**: 143–151.
- 619 **Ter Borg SJ. 2005.** Dormancy and germination of six *Rhinanthus* species in relation to  
620 climate. *Folia Geobotanica* **40**: 243–260.
- 621 **Tiagi B. 1966.** Development of the seed and fruit in *Rhinanthus major* and *R. serotinus*.  
622 *American Journal of Botany* **53**: 645–651.
- 623 **Tiffin P, Olson S, Moyle LC. 2001.** Asymmetrical crossing barriers in angiosperms.  
624 *Proceedings of the Royal Society of London. Series B: Biological Sciences* **268**: 861–867.
- 625 **Tuan PA, Kumar R, Rehal PK, Toora PK, Ayele BT. 2018.** Molecular mechanisms  
626 underlying abscisic acid/gibberellin balance in the control of seed dormancy and germination  
627 in cereals. *Frontiers in Plant Science* **9**.
- 628 **Turelli M, Moyle LC. 2007.** Asymmetric postmating isolation: Darwin’s corollary to  
629 Haldane’s rule. *Genetics* **176**: 1059–1088.
- 630 **Tyler L, Thomas SG, Hu J, et al. 2004.** DELLA proteins and gibberellin-regulated seed  
631 germination and floral development in *Arabidopsis*. *Plant Physiology* **135**: 1008–1019.
- 632 **Wang G, Köhler C. 2017.** Epigenetic processes in flowering plant reproduction. *Journal of*  
633 *Experimental Botany* **68**: 797–807.
- 634 **Warnes GR, Bolker B, Bonebakker L, et al. 2009.** gplots: Various R programming tools  
635 for plotting data. R package version 2.1 .
- 636 **Wesselingh RA, Hořčicová Š, Mirzaei K. 2019.** Fitness of reciprocal F<sub>1</sub> hybrids between  
637 *Rhinanthus minor* and *Rhinanthus major* under controlled conditions and in the field. *Journal*  
638 *of Evolutionary Biology* **32**: 931–942.
- 639 **Westbury DB. 2004.** Biological Flora of the British Isles: *Rhinanthus minor* L. *Journal of*  
640 *Ecology* **92**: 906–927.
- 641 **Whitney KD, Ahern JR, Campbell LG, Albert LP, King MS. 2010.** Patterns of  
642 hybridization in plants. *Perspectives in Plant Ecology, Evolution and Systematics* **12**: 175–  
643 182.

644 **Yadav SK. 2010.** Heavy metals toxicity in plants: An overview on the role of glutathione and  
 645 phytochelatin in heavy metal stress tolerance of plants. *South African Journal of Botany* **76**:  
 646 167–179.

647 **Ye J, McGinnis S, Madden TL. 2006.** BLAST: improvements for better sequence analysis.  
 648 *Nucleic Acids Research* **34**: W6–W9.

649 **Zhu F, Zhou Y-K, Ji Z-L, Chen X-R. 2018.** The plant ribosome-inactivating proteins play  
 650 important roles in defense against pathogens and insect pest attacks. *Frontiers in Plant*  
 651 *Science* **9**.

652

653

654

655 Table 1. Summary of assembly statistics generated by various pipelines. BUSCO Eukarya  
 656 database OrthoDB v.10 busco genes.

| <b>Workflow</b>                 | <b>Trinity</b> | <b>Trans-ABYSS</b> | <b>SPAdes-rna</b> |
|---------------------------------|----------------|--------------------|-------------------|
| Representation of RNA-seq reads | 97.53%         | 82.8%              | 74.59%            |
| <b>BUSCO Results</b>            |                |                    |                   |
| Complete                        | 91.8%          | 87.3%              | 58.1%             |
| Fragmented                      | 3.1%           | 8.6%               | 22.3%             |
| Missed                          | 5.1%           | 4.1%               | 19.6              |
| <b>General assembly metrics</b> |                |                    |                   |
| Length, Mbp                     | 306            | 298                | 163               |
| Number of transcripts           | 356379         | 317485             | 169473            |
| N50, bp                         | 1558           | 1461               | 1272              |

657

658 Table 2. Number of differentially expressed transcripts in three treatment comparisons  
 659 ([FDR] < 0.05 and |log<sub>2</sub>FC| ≥ 2) in F<sub>1</sub> hybrids between *Rhinanthus major* (a) and *R. minor*  
 660 (m), the letter indicating the maternal parent. NG = non-germinated seeds, G = germinated  
 661 seeds, after 40 or 60 days on wet filter paper at 4°C.

| Treatment                   | F <sub>1a_60_NG</sub> vs F <sub>1a_60_G</sub> |      | F <sub>1a_40_NG</sub> vs F <sub>1a_60_G</sub> |      | F <sub>1m_40_NG</sub> vs F <sub>1m_40_G</sub> |     | F <sub>1a_60_NG</sub> vs F <sub>1a_40_NG</sub> |      |
|-----------------------------|-----------------------------------------------|------|-----------------------------------------------|------|-----------------------------------------------|-----|------------------------------------------------|------|
| Number of upregulated genes | 735                                           | 1158 | 1634                                          | 2531 | 550                                           | 868 | 1053                                           | 1363 |

662

663

664



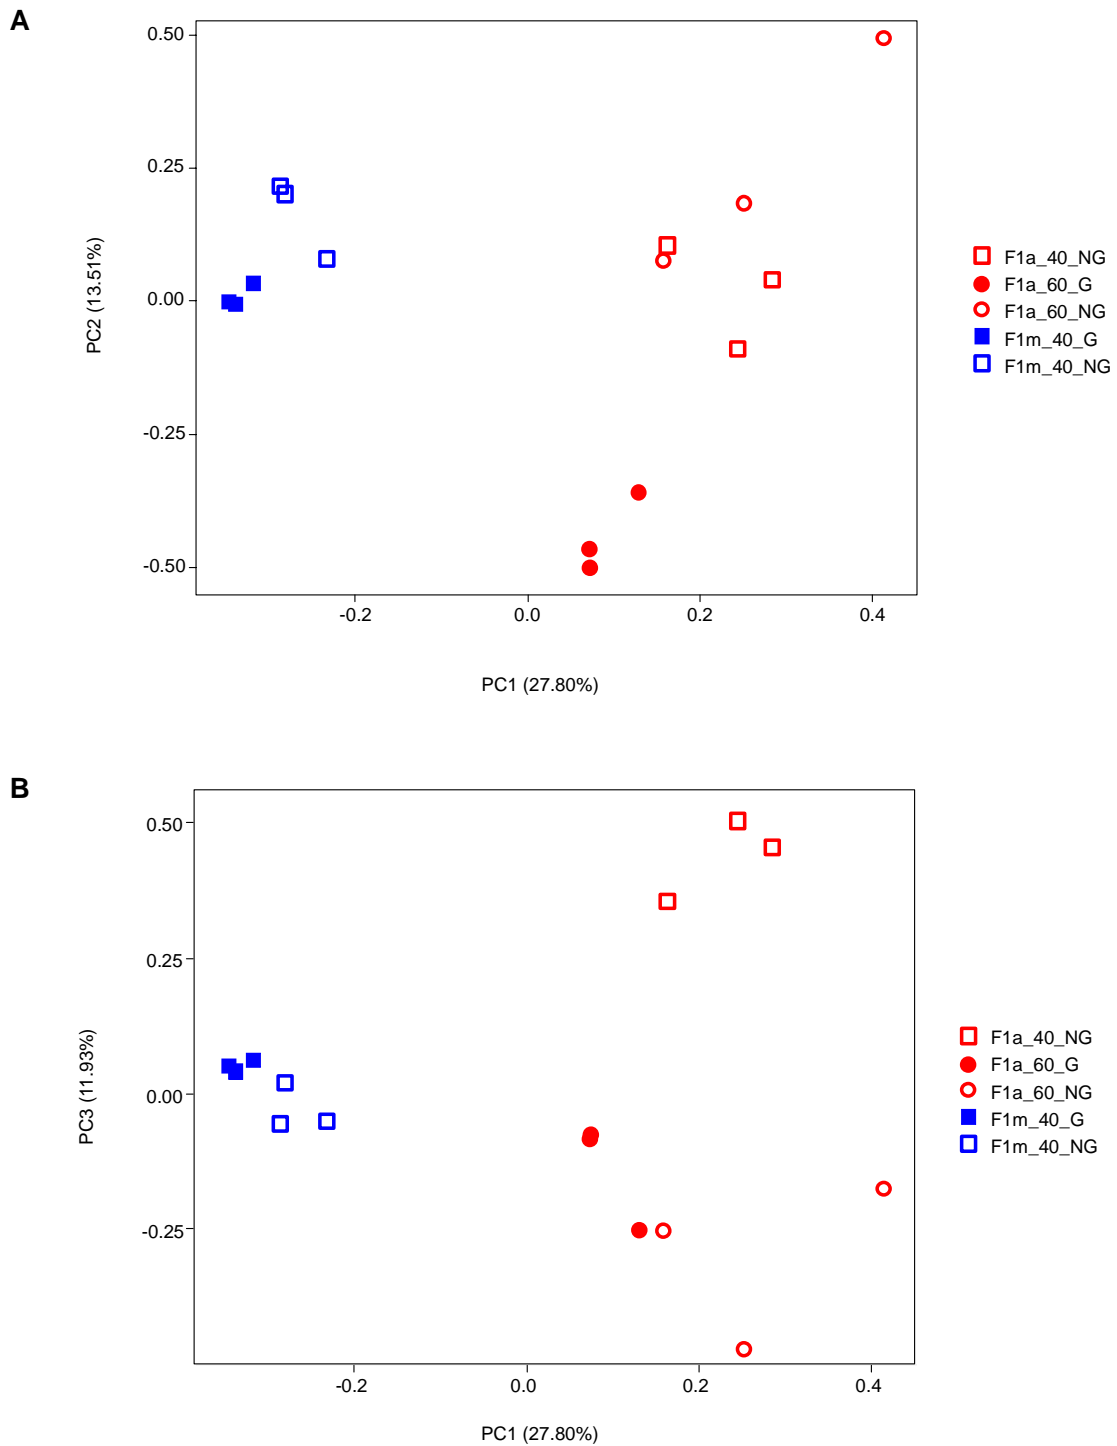

Fig. 1. Principal component analysis of RNA-seq samples of *Rhinanthus* hybrid seeds using variance-stabilized estimated raw counts. a) PC1-PC2, b) PC1-PC3

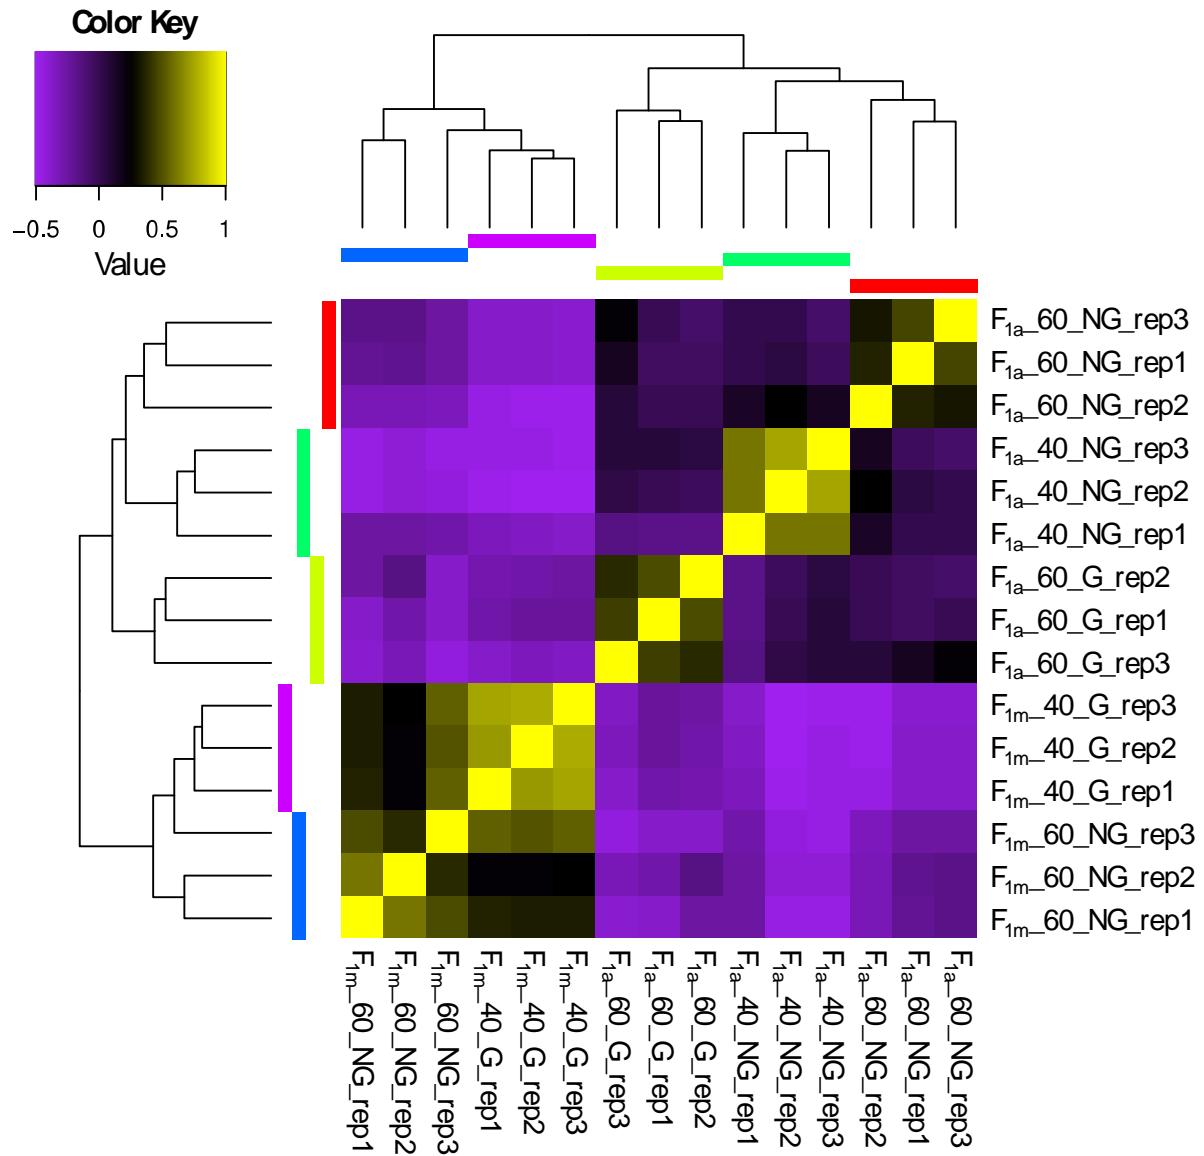

Fig. 2. Comparison among replicates in each group of germinated and non-germinated seeds of reciprocal F<sub>1</sub> hybrids between *Rhinanthus major* (a) and *R. minor* (m).

**A**

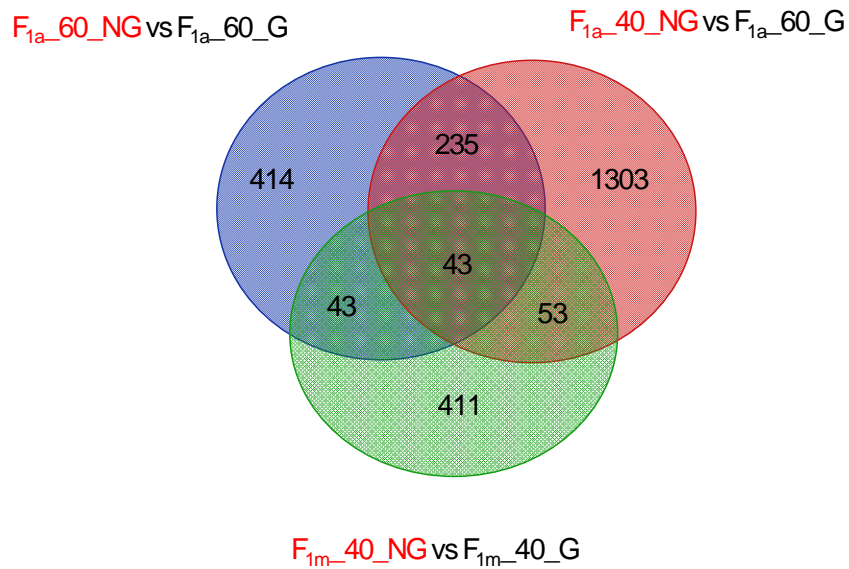

**B**

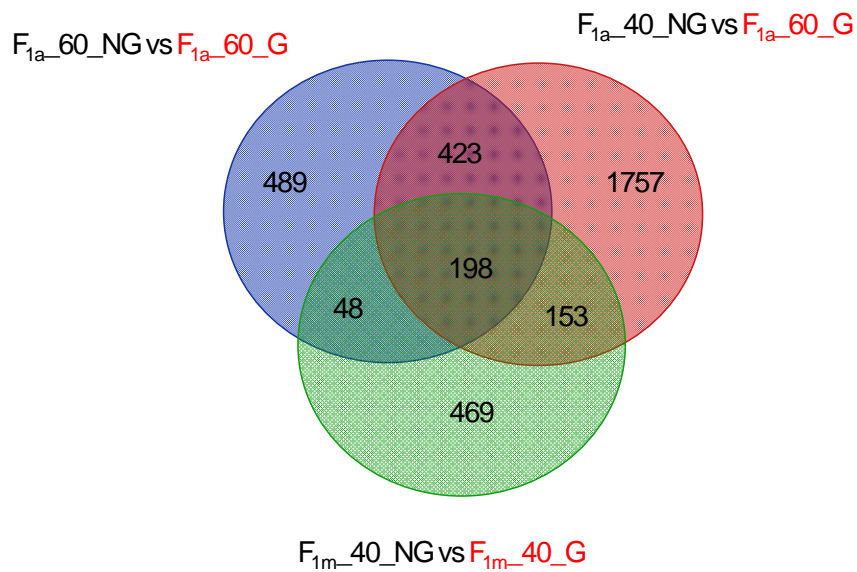

Fig. 3. Venn diagram showing the numbers of unique and shared upregulated genes in each comparative analysis between non-germinated (NG) seeds and germinated seeds (G) for a) the non-germinated seeds ( $F_{1a\_60\_NG}$ ,  $F_{1a\_40\_NG}$  and  $F_{1m\_40\_NG}$ ), and b) the germinated seeds ( $F_{1a\_60\_G}$  and  $F_{1m\_40\_G}$ ).

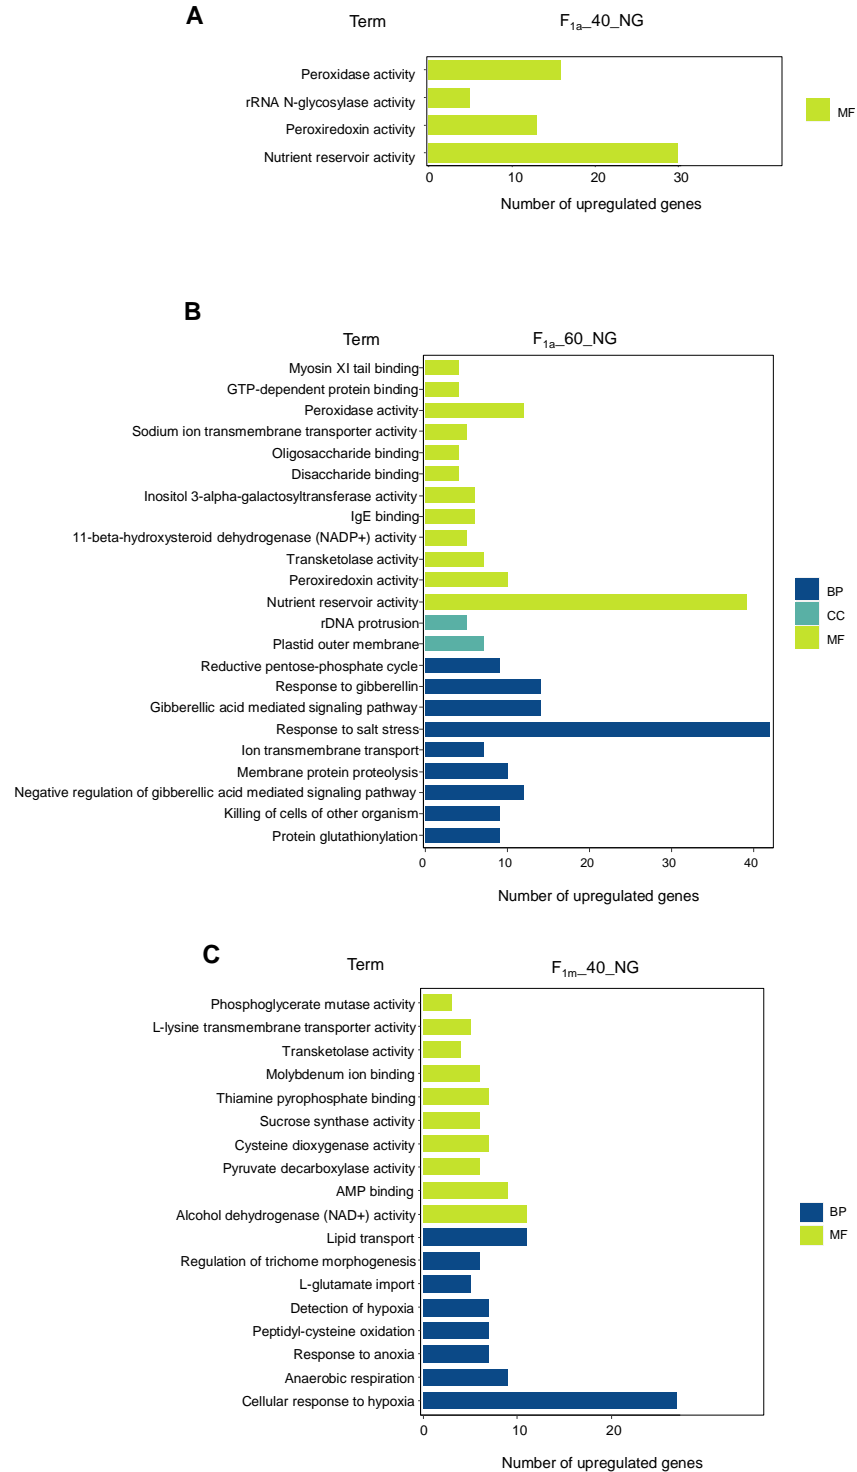

Fig. 4. GO pathway enrichment analysis, based on upregulated genes in a)  $F_{1a\_40\_NG}$  vs  $F_{1a\_60\_G}$ , b)  $F_{1a\_60\_NG}$  vs  $F_{1a\_60\_G}$  and c)  $F_{1m\_40\_NG}$  vs  $F_{1m\_40\_G}$ . BP = Biological process, CC= Cell cycle, MF= Molecular function

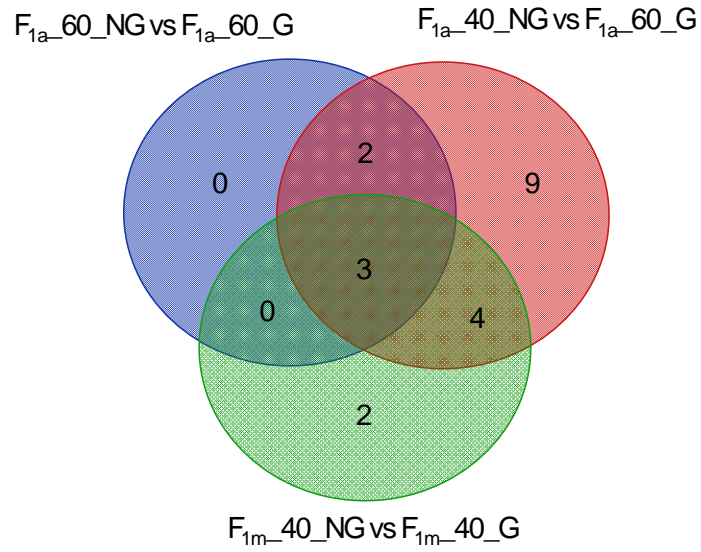

Fig. 5. Venn diagram showing the number of unique and shared KEGG pathways related to DE genes in germinated and non-germinated reciprocal F<sub>1</sub> hybrid seeds.
